# Supplementary material
Source: Springer Nature journal article supplement (https://www.springermedizin.de/resource/supplementary/12990_2011_384_MOESM1_ESM.pdf/9613166)

**A**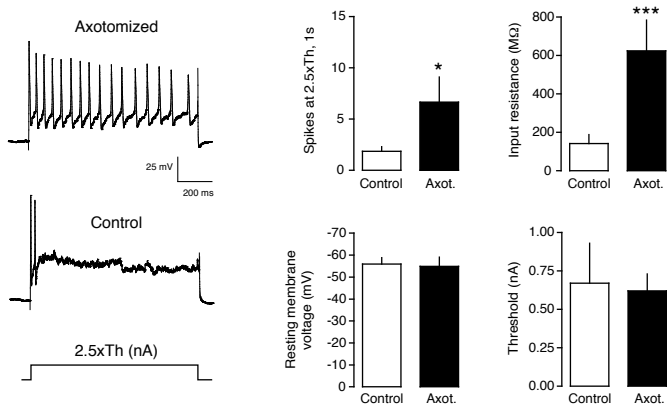**B**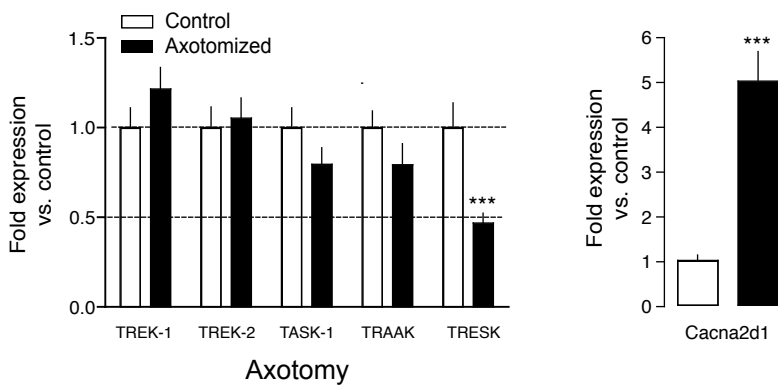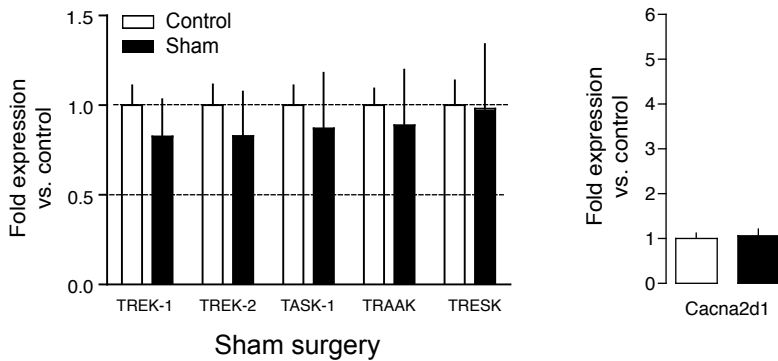

Supplement: MOESM1 [file 9613166]
